# Supplementary material
Source: PubMed Central journal article supplement (PMC3083295)
Supplement: supp_blood-2010-08-299917_Document1.pdf [file supp_blood-2010-08-299917_Document1.pdf]

**Table S1. SNPs and VNTRs analyzed for haplotype determination and the corresponding primers used to amplify each region**

| SNP/VNTR  | Position      | Fragm. (bp) | Primers                                                                  |
|-----------|---------------|-------------|--------------------------------------------------------------------------|
| rs1800285 | c.596+74G/A   | 384         | F: 5'GCCCAAAGGCCAGGGAGTTT 3'<br>R: 5'AGCCAGAAATCAAACCCGTCTGA 3'          |
| rs1800286 | c.710-12G/A   | 294         | F: 5'CCCAAGCCATATGCTCACC 3'<br>R: 5'GGTACAAACAGCACGTTTCAA 3'             |
| rs7190823 | c.796G/A      | 189         | F: 5'GCAGGTATCACACAAATTACAG 3'<br>R: 5'GCACAGTGAAACATACAGAGG 3'          |
| rs2239359 | c.1501G/A     | 247         | F: 5'TGACTGTAAAGGGCTGTGTTTC 3'<br>R: 5'GTGAGGAGTGGGCATGGA 3'             |
| rs1800335 | c.1715+82T/C  | 316         | F: 5'GGCCTTCACTGCTCAGTCTT 3'<br>R: 5'TGGGACACATTCCAAAGAGC 3'             |
| rs1800340 | c.2151+8T/C   | 328         | F: 5'AGCAGGATCCGTGGAATCGTAC 3'<br>R: 5'GAGAAGGCTCCATGCGTCTAATG 3'        |
| rs7195066 | c.2426G/A     | 444         | F: 5'GAGGGCCAGGCTGCTACTT 3'<br>R: 5'GACAGATAAAATTCTGGAAGG 3'             |
| rs1800345 | c.3240-42 G/A | 390         | F: 5'GACACAGGCCAAGGCTCTG 3'<br>R: 5'GGCATTCCAGACACTGTTCC 3'              |
| rs1061646 | c.3935-16T/C  | 314         | F: 5'CCAGCTGCTGACAGGTACC 3'<br>R: 5'GGACCCAGAAGTGCTGAGATG 3'             |
| rs1800359 | c.4260+29T/C  | 275         | F: 5'GACTATGGGGGACACACCAG 3'<br>R: 5'GGCTCTGGCAGAAATAGTCG 3'             |
| d16s3016  | 3' FANCA      | 178–210     | F: 5'CTCCCTGAGCAACAAACACC 3'<br>R: 5'GGTCATTTATATGCGCCTGA 3'             |
| d16s3121  | 3' FANCA      | 79–85       | F: 5'CATGTTGTACATCGTGATGC 3'<br>R: 5'AGCTTTTATTTCCCAGGGGT 3'             |
| d16s3407  | 5' FANCA      | 195–205     | F: 5'CCAACAATGCCAATTTCTAG 3'<br>R: 5'CTCAGCCACACAGATAAAC 3'              |
| d16s303   | 5' FANCA      | 101–121     | F: 5'GATCAGTGCTCGTTTTTTTTGGTTTGG 3'<br>R: 5'CAACAAGAGCGAAACTCGGTCTCAA 3' |

**Table S2. Analysis of hemizygosity of SNPs for breakpoint characterization of ex1-20del in *FANCA***

Size of amplified regions, primers used, and RT-PCR amplification conditions are shown.

| Gene                 | SNPs                                     | Fragm. (bp) | Primers                                                       | Amp. Cond.*                     |
|----------------------|------------------------------------------|-------------|---------------------------------------------------------------|---------------------------------|
| <i>SNPs region 1</i> |                                          |             |                                                               |                                 |
| <b>SPIRE2</b>        | rs9928396,<br>rs9935541                  | 389         | F: 5'TGCTCTCTGCATGGGAAGGG 3'<br>R: 5'GGATGTCATGGGTGTGTGGC 3'  | Hyb. T: 60°C<br>Ext time: 45"   |
| <b>FLJ20286</b>      | rs12596872,<br>rs8049897,<br>rs8051733   | 476         | F: 5'GAGGGTCTAGGCTAATAGGG 3'<br>R: 5'GTTTCCTTCTCTGGGTGAGG 3'  | Hyb. T: 58°C<br>Ext. time: 45"  |
| <b>GAS8</b>          | rs3743829,<br>rs3743827,<br>rs3743826    | 406         | F: 5'CCGCTGATGGGAATTATGGG 3'<br>R: 5'TGTGTGTGGTAAAGGGTGGG 3'  | Hyb. T: 60°C<br>Ext. time: 45"  |
| <i>SNPs region 2</i> |                                          |             |                                                               |                                 |
| <b>TCF25 (1)</b>     | rs1109334                                | 701         | F: 5'ACACGCATGCTAGAAGCTGG 3'<br>R: 5'TCTTCTGTCTGGGATGTGCG 3'  | Hyb. T: 56°C<br>Ext. time: 60"  |
| <b>TCF25 (2)</b>     | rs11866200,<br>rs2270461,<br>rs2270460   | 416         | F: 5'CGGCTTCCTTGATCTCAGAG 3'<br>R: 5'AGCAGTGACGATGGTGACAC 3'  | Hyb. T: 58°C<br>Ext. time: 45"  |
| <b>MC1R</b>          | rs3212359,<br>rs3212361,<br>rs3212363    | 706         | F: 5'AAGCAGGAAGGAGTCGTTGG 3'<br>R: 5'TGCTTTGGCTGAGAGCAGAG 3'  | Hyb. T: 58°C<br>Ext. time: 60"  |
| <i>SNPs region 3</i> |                                          |             |                                                               |                                 |
| <b>TCF25 (3)</b>     | rs7199642,<br>rs7184225,<br>rs12919894   | 1628        | F: 5'GCCTAGTTTTGCTTCTTCAG 3'<br>R: 5'CTGGCCTAGAATCTTTTCTG 3'  | Hyb. T: 54°C<br>Ext. time: 120" |
| <b>TCF25 (4)</b>     | rs12930056,<br>rs12930606,<br>rs17784386 | 950         | F: 5'CAAGGATACGATTCAGGAGC 3'<br>R: 5'CCATTGAAGTTCAGCTTGGC 3'  | Hyb. T: 56°C<br>Ext. time: 60"  |
| <b>TCF25 (5)</b>     | rs9806913,<br>rs9922515                  | 548         | F: 5'TCCCTCAAGGGTAAACTAGC 3'<br>R: 5'AATCGCTGTCCCTACTTCAG 3'  | Hyb. T: 56°C<br>Ext. time: 45"  |
| <b>TCF25 (6)</b>     | rs7184960,<br>rs2293586                  | 967         | F: 5'AGCTGCACTCACCTGTTCTC 3'<br>R: 5'ACCTCGTAGGTAAGGCAGAG 3'  | Hyb. T: 58°C<br>Ext. time: 60"  |
| <b>TCF25 (7)</b>     | rs11646448                               | 328         | F: 5'CCTTCTCAGCCTATGTCAC 3'<br>R: 5'CAGCTCTTGACTTTCTCTGC 3'   | Hyb. T: 56°C<br>Ext. time: 45"  |
| <b>TCF25 (8)</b>     | rs10153210,<br>rs10153196                | 418         | F: 5'CACTGGTACAATCCAATGCC 3'<br>R: 5'TTCCACTGGCGTATTTCTCTG 3' | Hyb. T: 54°C<br>Ext. time: 45"  |

\* Amp. Cond.: "Amplification conditions". Hyb. T.: "Hybridization temperature" and Ext. time.: "Extension time".

**Table S3. Genetic dosage analysis for breakpoint characterization of ex1-20del in *FANCA***  
The size of amplified regions, primers used, and RT-PCR amplification conditions are shown.

| <b>Region</b> | <b>Fragm. (bp)</b> | <b>Primers*</b>                                               | <b>Amp. Cond.</b>                     |
|---------------|--------------------|---------------------------------------------------------------|---------------------------------------|
| <b>SP1</b>    | 154                | F: 5'GAAGTCAAGAGTCCTGGTGT 3'<br>R: 5'CTGTGTCCTGAAGGATGTCT 3'  | Hyb. T: 58°C<br>Ext time: 11"         |
| <b>TC1</b>    | 202                | F: 5'TGTCATCTCCATCCGTCTTG 3'<br>R: 5'ATCTCAGCATGAGCGTTCAC 3'  | Hyb. T: 58°C<br>Ext time: 11"         |
| <b>TC2</b>    | 252                | F: 5'TGTTGTTTCGGCTCCATAGAC 3'<br>R: 5'CACTCAGGTCAAGTTTGTCG 3' | Hyb. T: 58°C<br>Ext time: 11"         |
| <b>TC3</b>    | 192                | F: 5'GAGTAGATTGTGTCCGAAGG 3'<br>R: 5'TCAGACTCTGTGGCTATCTC 3'  | Hyb. T: 58°C or 62°C<br>Ext time: 11" |
| <b>TC4</b>    | 256                | F: 5'TGCTGTCCTCAATCCTCTCT 3'<br>R: 5'GATTCTGTCTATGCTGAGCG 3'  | Hyb. T: 62°C<br>Ext time: 11"         |
| <b>TC5</b>    | 262                | F: 5'TGGATTCAAGTGTCTGGGGA 3'<br>R: 5'ACACAGTGCTCTTGACACA 3'   | Hyb. T: 62°C<br>Ext time: 11"         |
| <b>TC6</b>    | 207                | F: 5'TTTAGGGGTGGTCAGCCAT 3'<br>R: 5'CATCCTGTCCTTAATGCGTC 3'   | Hyb. T: 62°C<br>Ext time: 11"         |

\*Primers are all 30nt long and % of GC is 50.

Amp. Cond.: "Amplification conditions". Hyb. T.: "Hybridization temperature" and Ext. time.: "Extension time".

**Table S4. Spanish FA-A patients and corresponding mutations**

| Pat. ID | Mutation 1         |                             | Mutation 2                |                             |
|---------|--------------------|-----------------------------|---------------------------|-----------------------------|
|         | DNA                | Protein                     | DNA                       | Protein                     |
| FA5     | c.1115-1118delTTGG | V372AfsX42                  | c.4198C>T                 | R1800C                      |
| FA13    | c.3788_3790delTCT  | F1263del                    | c.3788_3790delTCT         | F1263del                    |
| FA16    | c.295C>T           | Q99X                        | c.295C>T                  | Q99X                        |
| FA27    | c.3788_3790delTCT  | F1263del                    | c.3788_3790delTCT         | F1263del                    |
| FA40    | c.1475A>G          | H492R                       | c.1475A>G                 | H492R                       |
| FA46    | c.3788_3790delTCT  | F1263del                    | c.3788_3790delTCT         | F1263del                    |
| FA47    | c.3788_3790delTCT  | F1263del                    | c.3788_3790delTCT         | F1263del                    |
| FA48    | c.3164G>T          | R1055L                      | c.3788_3790delTCT         | F1263del                    |
| FA49    | ex21-29del         | No Protein                  | ND*                       |                             |
| FA50    | ex21-29del         | No Protein                  | ND                        |                             |
| FA52    | c.3558insG         | R1187E fsX28                | c.710-5T>C                | Altered splicing            |
| FA53    | c.2851C>T          | R951W                       | c.3913C>T                 | L1305F                      |
| FA54    | ex6-14del          | No Protein                  | c.3558insG                | R1187EfsX28                 |
| FA55    | c.295C>T           | Q99X                        | c.295C>T                  | Q99X                        |
| FA56    | c.233_236delTTGA   | I78TfsX16                   | c.3913C>T                 | L1305F                      |
| FA58    | ex1-20del          | No Protein                  | c.821C>T                  | L274P                       |
| FA74    | ex1-3del           | No Protein                  | c.893+1G>T                | Exon 10 skipping            |
| FA75    | c.3788_3790delTCT  | F1263del                    | c.2639G>A                 | R880Q                       |
| FA82    | c.709+5G>T         | D237G+238ins10 (AFMTRCGFLD) | c.3788_3790delTCT         | F1263del                    |
| FA84    | c.3788_3790delTCT  | F1263del                    | c.1771C>T                 | R591X                       |
| FA87    | c.295C>T           | Q99X                        | c.295C>T                  | Q99X                        |
| FA88    | c.1147delG         | E383RfsX32                  | c.709+5 G>A               | D237G+238ins10 (AFMTRCGFLD) |
| FA91    | ex21-29del         | No Protein                  | c.2224C>A                 | Q742K                       |
| FA94    | c.1470+1G>T        | Exon 15 skipping            | c.2641 C>T                | Q881X                       |
| FA102   | ex21-22del         | No Protein                  | c.1115-1118delTTGG        | V372AfsX42                  |
| FA103   | c.295C>T           | Q99X                        | c.295C>T                  | Q99X                        |
| FA105   | ex4-5del           | No Protein                  | c.1115-1118delTTGG        | V372AfsX42                  |
| FA106   | ex15-43del         | No Protein                  | c.1115-1118delTTGG        | V372AfsX42                  |
| FA108   | c.295C>T           | Q99X                        | c.295C>T                  | Q99X                        |
| FA109   | c.295C>T           | Q99X                        | c.295C>T                  | Q99X                        |
| FA110   | c.3558insG         | R1187E fsX28                | c.987_990delTCAC          | H330AfsX4                   |
| FA112   | c.1771C>T          | R591X                       | c.1771C>T                 | R591X                       |
| FA113   | c.295C>T           | Q99X                        | c.295C>T                  | Q99X                        |
| FA117   | c.3558insG         | R1187E fsX28                | c.3788_3790delTCT         | F1263del                    |
| FA122   | c.295C>T           | Q99X                        | c.295C>T                  | Q99X                        |
| FA123   | c.295C>T           | Q99X                        | c.295C>T                  | Q99X                        |
| FA125   | c.65G>A            | W22X                        | c.1115-1118delTTGG        | V372AfsX42                  |
| FA126   | c.65G>A            | W22X                        | c.1115-1118delTTGG        | V372AfsX42                  |
| FA145   | ex1-20del          | No Protein                  | c.893+920 C>A             | Altered splicing            |
| FA153   | c.3558insG         | R1187E fsX28                | c.4123_4139del17          | T1375Sfs                    |
| FA155   | c.3788_3790delTCT  | F1263del                    | c.3348+5 G>A and 3335 T>G | Exon 33 skipping            |
| FA157   | ex4-5del           | No Protein                  | c.3788_3790delTCT         | F1263del                    |
| FA163   | ex3del             | No Protein                  | ex3del                    | No Protein                  |
| FA164   | c.4130C>G          | S1377X                      | c.3788_3790delTCT         | F1263del                    |
| FA166   | c.3558insG         | R1187E fsX28                | ND                        |                             |
| FA170   | ex1-6del           | No Protein                  | c.3788_3790delTCT         | F1263del                    |
| FA178   | c.3558insG         | R1187E fsX28                | c.3558insG                | R1187E fsX28                |
| FA183   | c.2535_2536delCT   | L845fs                      | c.1703delT                | V568AfsX                    |
| FA184   | c.2535_2536delCT   | L845fs                      | c.1703delT                | V568AfsX                    |
| FA192   | c.3788-3790delTCT  | F1263del                    | c.3828+1G>T               | Exon 38 skipping            |
| FA203   | c.718C>T           | Q240X                       | c.1115-1118delTTGG        | V372AfsX42                  |
| FA311   | c.3788_3790delTCT  | F1263del                    | c.3913C>T                 | L1305F                      |
| FA300   | c.295C>T           | Q99X                        | c.295C>T                  | Q99X                        |
| FA304   | c.295C>T           | Q99X                        | c.295C>T                  | Q99X                        |
| FA306   | c.233_236delTTGA   | T78IfsX16                   | c.3239G>A                 | R1080Q                      |
| FA328   | c.2303T>C          | L768P                       | c.2303T>C                 | L768P                       |
| FA330   | c.238delT          | C80VfsX                     | c.238delT                 | C80VfsX                     |
| FA334   | ex19-21del         | No Protein                  | c.1115-1118delTTGG        | V372AfsX42                  |
| FA337   | c.284delG          | G95AfsX                     | c.4124_4125delCA          | T1375SfsX                   |
| FA345   | ex16-17del         | No Protein                  | c.1115-1118delTTGG        | V372AfsX42                  |
| FA360   | c.3788_3790delTCT  | F1263del                    | c.4198C>T                 | R1800C                      |
| FA363   | ex4-6del           | No Protein                  | ex4-6del                  | No Protein                  |
| FA378   | ex18-20del         | No Protein                  | c.1873G>C                 | C625S                       |
| FA379   | c.295C>T           | Q99X                        | c.295C>T                  | Q99X                        |
| FA387   | ex28-29del         | No Protein                  | c.50delG                  | G17AfsX17                   |
| FA388   | c.1115_1118delTTGG | V372AfsX42                  |                           |                             |
| FA407   | c.3788_3790delTCT  | F1263del                    | c.3788_3790delTCT         | F1263del                    |

\*ND: Not detected

**Figure S1. 5' breakpoint characterization of ex1-20del in patient FA145 by microarray CGH**

(A) Localization and  $\text{Log}_2$ ratio obtained for the BACs in *FANCA* region. *FANCA* position is also provided (Human version NCBI36). (B) Graph showing mean  $\text{log}_2$ ratio values of all BACs in chromosome 16 (Microarray 1.4Mb). The BACs relevant for this study are highlighted. (C) Scheme of studied region showing gene and BAC positions. The region previously known to be deleted by MLPA is shown in red. The region in which the breakpoint should be located is marked in purple.

a

| BAC                                          | From(Kb) | To (Kb) | $\text{Log}_2$ ratio | $SD_{\text{Log}_2\text{rat}}$ |
|----------------------------------------------|----------|---------|----------------------|-------------------------------|
| <i>Array 1.4Mb USCF</i>                      |          |         |                      |                               |
| RP11-7D23                                    | 88297    | 88466   | -0,48764             | 0,0153                        |
| PAC191P24                                    | 88827    | 88830   | -0,11170             | 0,0067                        |
| <i>Tiling resolution Array (32K) (BCCRC)</i> |          |         |                      |                               |
| RP11354M24                                   | 88290    | 88417   | 0,14897              | 0,0117                        |
| RP11665E03                                   | 88469    | 88686   | -0,08293             | 0,0035                        |
| <i>FANCA</i>                                 | 88331    | 88410   |                      |                               |

b

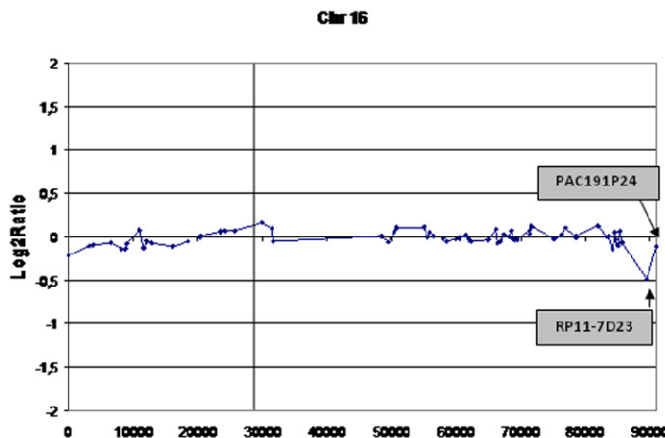

c

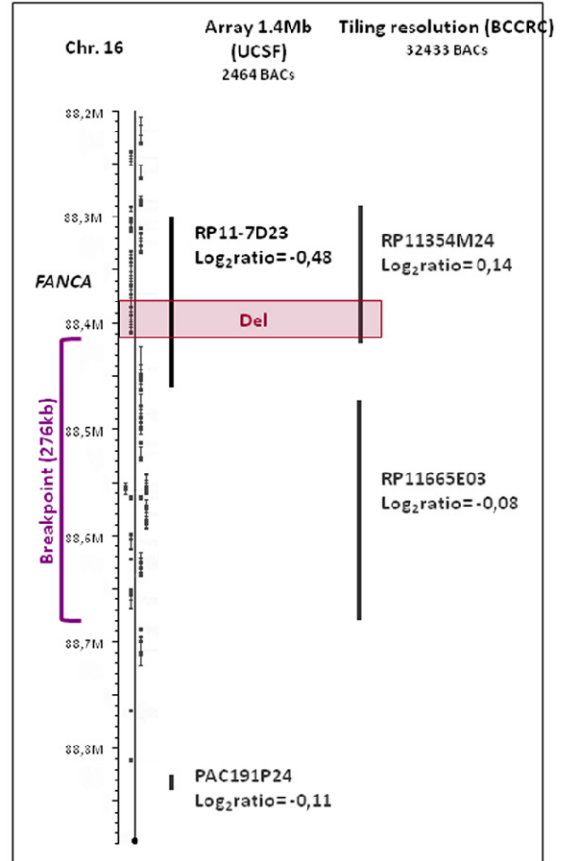

**Figure S2. 5' breakpoint characterization of ex1-20del in patient FA145 by analysis of homozygosity/hemizyosity of SNPs in patient FA145 and progenitors**

FA145m (mother) is the carrier of ex1-20del and is indicated with an asterisk (\*). SNP analysis was conducted in 3 rounds. In each round, the region containing the breakpoint was narrowed down as indicated. The key color used to indicate alleles found for each SNP is shown in the lower-right corner of the figure.

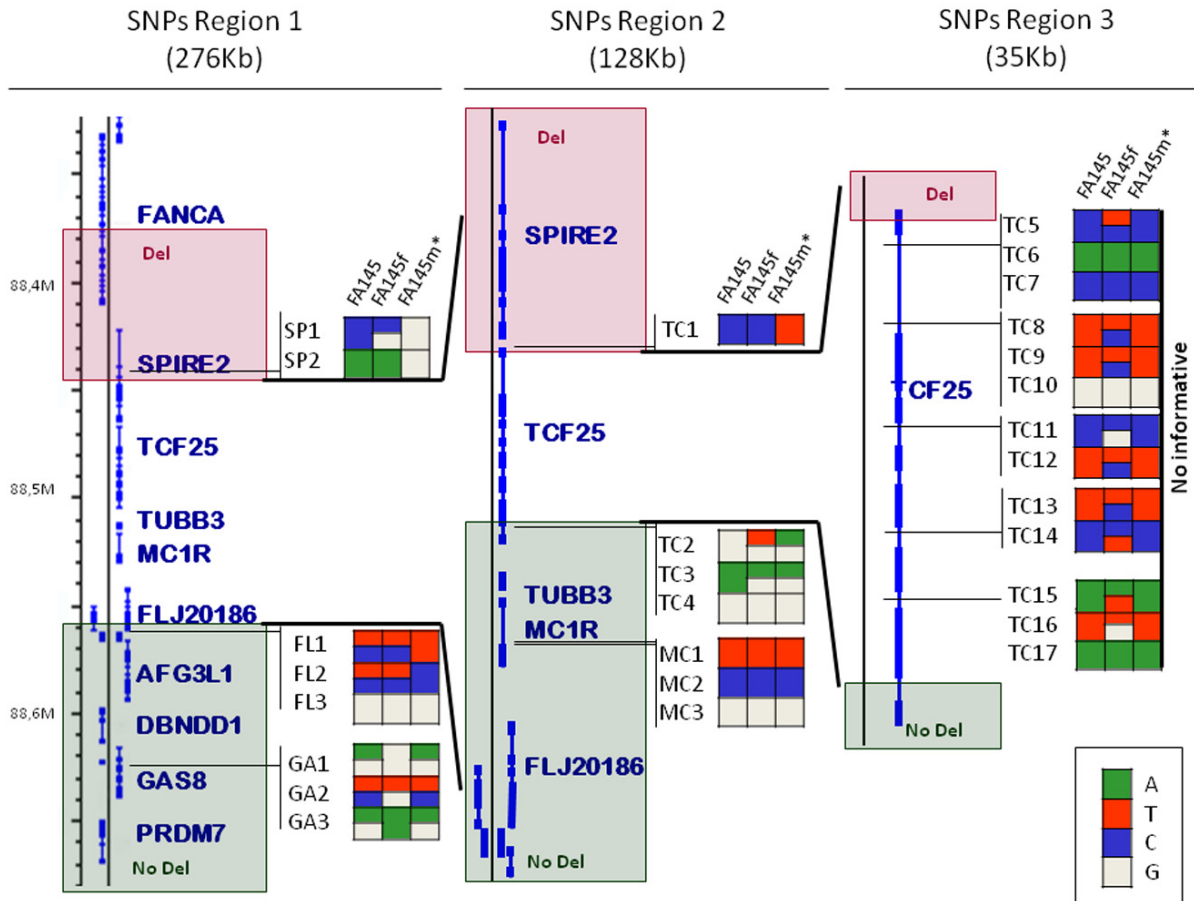

**Figure S3. 5' breakpoint characterization of ex1-20del in patient FA145 by gene-dosage quantification by Real Time PCR**

(A) Scheme of the amplified regions in *TCF25* gene and the relative copy number value obtained. (B) Results obtained in patient (FA145) and reference (FA145f), including the normalization of results (using control region RT-TC3), and ratio calculation.

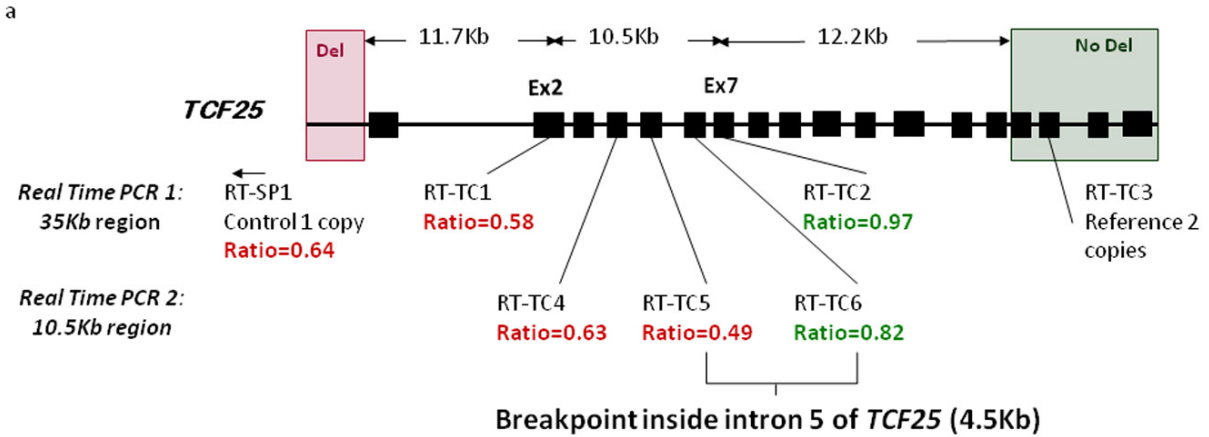

b

| Real Time PCR 1             |        |             |             | Real Time PCR 2 |                             |        |             |             |             |
|-----------------------------|--------|-------------|-------------|-----------------|-----------------------------|--------|-------------|-------------|-------------|
|                             | RT_TC3 | RT_SP1      | RT_TC1      | RT_TC2          |                             | RT_TC3 | RT_TC4      | RT_TC5      | RT_TC6      |
| FA145f                      | 1      | 14,44       | 41,59       | 2,08            | FA145f                      | 1      | 4,67        | 2,87        | 1,51        |
| FA145                       | 1,04   | 9,72        | 25,33       | 2,10            | FA145                       | 1,24   | 3,70        | 1,76        | 1,54        |
| FA145_Norm                  |        | 9,34        | 24,35       | 2,02            | FA145_Norm                  |        | 2,98        | 1,41        | 1,24        |
| <b>Ratio (FA145/FA145f)</b> |        | <b>0.64</b> | <b>0.58</b> | <b>0.97</b>     | <b>Ratio (FA145/FA145f)</b> |        | <b>0.63</b> | <b>0.49</b> | <b>0.82</b> |
